# Supplementary material
Source: PubMed Central journal article supplement (PMC4858942)
Supplement: 10.1074_M115.056598_mcp.M115.056598-1.pdf [file 10.1074_M115.056598_mcp.M115.056598-1.pdf]

**Supplemental material to Zilkenat S. et al. “Determination of the stoichiometry of the complete bacterial type III secretion needle complex using a combined quantitative proteomic approach”**

**Table S1: Strains and plasmids**

| <i>Salmonella</i>       | Description                                       | Reference           |
|-------------------------|---------------------------------------------------|---------------------|
| SB762                   | wild type (SL1344, flhD::tet)                     | (1)                 |
| SB1769                  | SpaS <sub>N258A</sub> <sup>FLAG</sup> , flhD::tet | (2)                 |
| SB1906                  | InvA <sup>FLAG</sup> , flhD::tet                  | (2)                 |
| MIB3085                 | $\Delta$ spaO, flhD::tet                          | this study          |
|                         |                                                   |                     |
| <i>Escherichia coli</i> | Description                                       | Reference           |
| AT713                   | auxotroph Arg, Lys                                | (3)                 |
|                         |                                                   |                     |
| Plasmid                 | Description                                       | Reference           |
| pSB3292                 | pBAD24, Hila                                      | (4)                 |
| pMAL-c5x                | vector for maltose binding protein fusion         | New England Biolabs |
| pMIB5117                | pUC57-PCS1                                        | this study          |
| pMIB5118                | pMAL-c5x-PCS1                                     | this study          |
| pMIB5363                | pMAL-c5x-PCS2                                     | this study          |

**References**

1. Kaniga, K., Tucker, S., Trollinger, D., and Galan, J. E. (1995) Homologs of the Shigella IpaB and IpaC invasins are required for *Salmonella typhimurium* entry into cultured epithelial cells. *J Bacteriol* 177, 3965–3971
2. Wagner, S., Königsmaier, L., Lara-Tejero, M., Lefebvre, M., Marlovits, T. C., and Galán, J. E. (2010) Organization and coordinated assembly of the type III secretion export apparatus. *Proc Natl Acad Sci USA* 107, 17745–17750
3. Taylor, A. L., and Trotter, C. D. (1967) Revised linkage map of *Escherichia coli*. *Bacteriol Rev* 31, 332–353
4. Lara-Tejero, M., Kato, J., Wagner, S., Liu, X., and Galán, J. E. (2011) A sorting platform determines the order of protein secretion in bacterial type III systems. *Science* 331, 1188–1191

**Table S2: Oligonucleotides used for cloning of the peptide concatenated standards into pMAL-c5x**

| Oligonucleotide       | Description       | Sequence 5' – 3'                                            |
|-----------------------|-------------------|-------------------------------------------------------------|
| gib_pMalc5x_QCAT4.1_f | cloning PCS2      | CATGGGCGGCCGCGATATCGTCGACGGATCCCGCTTCTGAAGAACAGTTTTG<br>CAG |
| gib_pMalc5x_QCAT4.2_r | cloning PCS2      | CTGAGCCTTTCGTTTTATTGAAGCTTCGATCTAAGCGGCTTTCAGTACATGAG       |
| gib_QCAT4.1_4.2_f     | cloning PCS2      | CTTGCAATTGGCCAAAGGCGCCGGCAACATCAAAATTGTAGCCTATC             |
| gib_QCAT4.2_4.1_r     | cloning PCS2      | GATAGGCTACAATTTTGATGTTGCCGGCGCCTTTGGCCAATGCAAG              |
| gib_pMalc5x_f         | cloning PCS1      | AAGCTTCAAATAAAAACGAAAGGCTCAG                                |
| gib_pMalc5x_r         | cloning PCS1      | GGATCCGTCGACGATATCGCGGCCGCCATG                              |
| pMal_seqf             | sequencing primer | GTCGTCTGACTGTTCGATGAAG                                      |
| pMal_seqr             | sequencing primer | GATTTGTCCTACTCAGGAG                                         |
| QCAT3_seq_1254_f      | sequencing primer | GATCGTGAGCTTGTGCGAG                                         |
| QCAT3_set1_f          | sequencing primer | CTAGGGATCCGCACGCTTGTATCCGCAATTG                             |
| QCAT3_set2_f          | cloning PCS1      | CTGAGGATCCCGCCCGCCTAAAC                                     |
| QCAT3_set1_r          | cloning PCS1      | CTAGAAGCTTTCATTCCAGAACGTG                                   |

**Table S3: Composition of defined M9 for expression of MBP-PCS in *E. coli* AT713.**

|                                                                   | final concentration |
|-------------------------------------------------------------------|---------------------|
| M9 salts                                                          | 1X                  |
| glucose                                                           | 0.2 %               |
| thiamine                                                          | 0.05 mg/ml          |
| D-biotin                                                          | 0.004 mg/ml         |
| amino acids, each                                                 | 0.071 mg/ml         |
| <sup>13</sup> C <sub>6</sub> , <sup>15</sup> N <sub>4</sub> - Arg | 0.071 mg/ml         |
| <sup>13</sup> C <sub>6</sub> , <sup>15</sup> N <sub>2</sub> - Lys |                     |
| CaCl <sub>2</sub>                                                 | 100 μM              |
| MgSO <sub>4</sub>                                                 | 1 mM                |
| CaCl <sub>2</sub>                                                 | 20 μM               |
| MnCl <sub>2</sub>                                                 | 5 μM                |
| ZnSO <sub>4</sub>                                                 | 5 μM                |
| CoCl <sub>2</sub>                                                 | 1 μM                |
| CuCl <sub>2</sub>                                                 | 0.7 μM              |
| Na <sub>2</sub> MoO <sub>4</sub>                                  | 2 μM                |
| MgSO <sub>4</sub>                                                 | 35 μM               |
| H <sub>3</sub> BO <sub>3</sub>                                    | 15 μM               |
| FeSO <sub>4</sub>                                                 | 5 μM                |

**Table S4: Raw data IDs used for calculating the mean stoichiometry of each protein.**

Found in a separate xls file.

**Table S5: List of peptides of the proteins of interest used for the construction of PCS1 and PCS2.** Three peptides were chosen from the total number of unique peptides detected for each protein (unique peptides include miscleaved forms). Coverage ranged from 14% (SpaR) and 98% (InvG) but was below 50% for all export apparatus proteins. Peptides for PCS are shown in bold, contextual flanking sequences to improve digestion are in regular format. Asterisks indicates position that can cause modification or missed-cleavage.

| Protein | PCS1                     |          |                                                                                                        | PCS2                     |          |                                                                       |
|---------|--------------------------|----------|--------------------------------------------------------------------------------------------------------|--------------------------|----------|-----------------------------------------------------------------------|
|         | Unique peptides detected | Coverage | Peptides                                                                                               | Unique peptides detected | Coverage | Replacement peptides for PCS2                                         |
| InvA    | 27                       | 37.17%   | ADLK <b>AGIIDADAAR</b> E<br>TLAR <b>NVNEYFGIQETK</b> HMLD<br>DLDK <b>VSTETVPLILLVPK</b> SR             | 34                       | 45.92%   | TVQR <b>ISEVLQR</b> LLSE                                              |
| InvG    | 34                       | 62.17%   | GYTR <b>DANTDTVQSIPFLGK</b> LPLI<br>GNIK <b>IVAYPDTNSLLVK</b> GTAE<br>PHGK <b>SLLVGGYTR</b> DANT       | 44                       | 89.34%   | IGDK <b>LGVSLNQSSISTLDGSR</b> FIAA                                    |
| PrgH    | 26                       | 45.55%   | YIVR <b>LLNSSLNGCEPLLTGR</b> TLFV<br>GR <b>SFQYGAEGYIK</b> MSPG<br>TWGGR <b>YVQFAIELK</b> DDWL         | 26                       | 57.51%   | AR <b>QFVDSYYR</b> TWGG<br>EK <b>TITSPGPYIVR</b> LLNS                 |
| PrgJ    | 7                        | 73.53%   | ITNR <b>IEDPNLVTPDK</b> ELAI<br>LDDR <b>LLQAFSGSAIATAVDK</b> QTIT<br>AR <b>SIATIVPENAVIGQAVNIR</b> SME | 10                       | 98.04%   | VNIR <b>S*METDIVSLDDR</b> LLQA                                        |
| PrgK    | 16                       | 57.71%   | AR <b>LYSAIEQR</b> LEQS<br>FLK <b>NSFADVDYDNISVLSER</b> SDAQ<br>RPPK <b>PVHLSALAVYER</b> GSPL          | 16                       | 62.85%   | LSER <b>SDAQLQAPGTPVK</b> RNSF                                        |
| SpaP    | 7                        | 23.56%   | YSD*R <b>ELVQFFENAQLK</b> AA<br>SLSK <b>HVDEGLDGY*RDYLIK</b> YSD<br>AQL*K <b>*RQYGEETETV*K*R</b> D AA  | 10                       | 29.78%   | DK <b>DEIE*KPSIFALLPAYALSEIK</b> SAFK                                 |
| SpaQ    | 2                        | 21.84%   | AAR <b>*MDDLVFAGNK</b> ALYI<br>SYGR <b>QVIFLALAK</b> G A                                               | 4                        | 22.99%   |                                                                       |
| SpaR    | 1                        | 2.65%    | FYER <b>GATHVLE</b>                                                                                    | 3                        | 14.02%   | LLSR <b>FAPQ*MNAFAISLTVK</b> SGIA<br>NVLR <b>LSFQATGLSSWFYER</b> GATH |
| SpaS    | 3                        | 9.24%    | NAGK <b>DVIQPQENEVR</b> H<br>A R <b>EVH*MEILSEQVK</b> AA<br>YAEK <b>VGVPVIVDIK</b> LA                  | 4                        | 12.89%   | THRR <b>YDLVSLEEIDEVLR</b> LLVW<br>EVLR <b>LLVWLEEVENAGK</b> DVIQ     |

**Table S6:** Percentage of intensity of peptides of peptide concatenated standard incorporated with light arginine or lysine when grown in M9 medium supplemented only with heavy arginine/lysine.

| Protein | Peptide                | Intensity percentage of light Arg and Lys incorporated into the PCS |
|---------|------------------------|---------------------------------------------------------------------|
| PrgK    | NSFADVDYDNISVVLSEK     | below detection limit                                               |
|         | SDAQLQAPGTPVK          | 1.78                                                                |
|         | SDAQLQAPGTPVKR         | below detection limit                                               |
| PrgJ    | LLQAFSGSAIATAVDK       | 0.34                                                                |
|         | LLQAFSGSAIATAVDKQTITNR | below detection limit                                               |
|         | SMETDIVSLDDR           | below detection limit                                               |
| PrgH    | LLNSSLNGCEFLLTGR       | below detection limit                                               |
|         | QFVDSYYR               | below detection limit                                               |
|         | TITSPGPIYVR            | below detection limit                                               |
| SpaS    | LLVWLEEEVENAGK         | 1.9                                                                 |
|         | RYDLVSLEEIDEVLR        | below detection limit                                               |
|         | VGVPVIVDIK             | 0.1                                                                 |
|         | VGVPVIVDIKLAR          | below detection limit                                               |
|         | YDLVSLEEIDEVLR         | below detection limit                                               |
| SpaR    | FAPQMNAFAISLTVK        | below detection limit                                               |
|         | LSFQATGLSSWFYER        | below detection limit                                               |
| SpaQ    | MDDLVFAGNK             | 1.49                                                                |
|         | QVIFLALAK              | 1.49                                                                |
| SpaP    | DEIEKPSIFALLPAYALSEIK  | below detection limit                                               |
|         | ELVQFFENAQLK           | 1.15                                                                |
|         | HVDEGLDGYR             | below detection limit                                               |
|         | HVDEGLDGYRDYLIK        | below detection limit                                               |
|         | YSDRELVQFFENAQLK       | below detection limit                                               |
| InvA    | ISEVLQR                | below detection limit                                               |
|         | NVNEYFGIQETK           | 1.44                                                                |
|         | VSTETVPLILLVPK         | 1.51                                                                |
|         | VSTETVPLILLVPKSR       | below detection limit                                               |
| InvG    | IVAYPDTNSLLVK          | 1.53                                                                |
|         | LGVSLNQSSISTLDGSR      | below detection limit                                               |
|         | SLLVGGYTR              | below detection limit                                               |
